# Supplementary material for: Experimental and molecular approximation to microbial niche: trophic interactions between oribatid mites and microfungi in an oligotrophic freshwater system
Source: PeerJ. 2018 Jul 11;6:e5200. doi: 10.7717/peerj.5200 (PMC6045919; doi:10.7717/peerj.5200)
Supplement: Supplemental Information 1 [file peerj-06-5200-s001.xlsx]

## Sheet: Hoja1
ID	Hit	% Identity	Coverage	Reference sequence
a-c	Aspergillus niger	100	100	MG991673.1
a-b-c	Talaromyces sp.	100	100	KT193820.1
b-c	Aspergillus niger	100	100	KJ567460
Microfungi	NCBI Accession number	% Identity	Reference sequences	Reference organism
Aspergillus niger	KY548382	99	KP317994, HG798741,	Aspergillus niger
Talaromyces sp.	MH223590	99	JX965247, JX965228, JX965227, JX965226, JX965224, JX965223, JX965214, JN899316, JN899315, KJ599668	Talaromyces amestolkiae, Talaromyces purpureogenus
Pleosporales sp.	MH223589	100	KU933800-KU933823	Pleosporales
CCB oribatid	NCBI Accession number
Trhypochthoniellus sp.	MH376285, MH376286, MH376287, MH376288, MH376289
